# Supplementary material for: A regression model for risk difference estimation in population-based case–control studies clarifies gender differences in lung cancer risk of smokers and never smokers
Source: BMC Med Res Methodol. 2013 Nov 19;13:143. doi: 10.1186/1471-2288-13-143 (PMC3840559; doi:10.1186/1471-2288-13-143)
Supplement: Additional file 2 — R script file showing examples of lexpit modeling and supporting functions using the R blm package. [file 1471-2288-13-143-S2.r]

# Example Analyses

# Manuscript Title: A regression model for risk difference estimation in population-based case-control studies clarifies gender differences in lung cancer risk of smokers and never smokers

library(blm) # Load Version 2013.2.4.4 of blm

load(file="simEAGLE.RData") # Simulated EAGLE dataset, Change Directory if simEAGLE is not in working directory


# Additive model
fit0 <- blm(case~packyears+female, data = eagle,
			weights = simEAGLE$sample_weights,
			strata = simEAGLE$strata)

which.at.boundary(fit0) # Check for covariate types at boundary
			
summary(fit0) # Summary Table of Risk Differences

coef(fit0) # Scale of Coefficients are 3-Year Abs Risk of Lung Cancer

confint(fit0) # 95% Confidence Interval


# Crude Risk-Exposure Relationship for Pack-Years
risk <- crude.risk(case~packyears,
		  weights = simEAGLE$sample_weights,
		  data = simEAGLE)

risk.exposure.plot(risk, xlab = "Packyears", pch = 19, las = 1)

	
# Additive-multiplicative model with multiplicative effect of years quit
fit1 <- lexpit(formula.linear = case~packyears*female, 
			formula.expit = case~quit_years,
			data = eagle,
			weights = simEAGLE$sample_weights,
			strata = simEAGLE$strata)

which.at.boundary(fit1) # Check for covariate types at boundary

summary(fit1) # Summary Table of Risk Differences

coef(fit1) 

fit1@coef.linear # Scale of Coefficients are 3-Year Abs Risk of Lung Cancer
fit1@coef.expit # Scale of Multiplicative Terms is Residual Odds

confint(fit1) # 95% Confidence Interval

EO(fit1) # Popluation-based calibration
EO(fit1, simEAGLE$smoke_status) # Popluation-based calibration by smoke status

# Hosmer-Lemeshow Goodness-of-fit
gof(fit1)
